# Supplementary material for: Access to social protection by people living with, at risk of, or affected by HIV in Eswatini, Malawi, Tanzania and Zambia - results from Population-Based HIV Impact Assessments
Source: bioRxiv or medRxiv preprint supplement (doi:10.1101/2021.10.11.21264851), 2021-10-14
Supplement: Supplementary file [file media-1.pdf]

**Table 1. Per capita gross domestic product, Gini index, poverty ratio, HIV estimates and proportion of people who reported accessing any social protection benefit, by country**

| Indicator                                                                                                              | Eswatini                     | Malawi                        | Tanzania                           | Zambia                             |
|------------------------------------------------------------------------------------------------------------------------|------------------------------|-------------------------------|------------------------------------|------------------------------------|
| Population <sup>1</sup>                                                                                                | 1 148 130                    | 18 628 747                    | 58 005 463                         | 17 861 030                         |
| Per capita gross domestic product (GDP) (current USD) <sup>1</sup>                                                     | 3894.68                      | 411.55                        | 1122.12                            | 1305.06                            |
| Gini index World Bank estimate <sup>1</sup>                                                                            | 54.6                         | 44.7                          | 40.5                               | 57.1                               |
| Poverty head count ratio at national poverty lines (% of population) <sup>1</sup>                                      | 58.9                         | 51.5                          | 26.4                               | 54.4                               |
| Number of adults and children living with HIV <sup>2</sup>                                                             | 200 000<br>[190 000–220 000] | 1 100 000 [960 000–1 100 000] | 1 700 000<br>[1 500 000–1 800 000] | 1 200 000<br>[1 200 000–1 300 000] |
| HIV prevalence rate of adults ages 15 to 49 <sup>2</sup>                                                               | 27.0 [24.6–28.7]             | 8.9 [7.6–9.6]                 | 4.8 [4.1–5.3]                      | 11.5 [10.9–12.1]                   |
| HIV prevalence among young women <sup>2</sup>                                                                          | 12.3 [5.7–16.2]              | 4.2 [2.2–5.8]                 | 2.2 [1.0–3.3]                      | 5.5 [2.8–7.4]                      |
| HIV incidence per 1000 population (adults 15–49)                                                                       | 9.77<br>[7.79–12.44]         | 3.71 [3.13–4.23]              | 2.57 [2.27–2.87]<br>860 000        | 6.03 [5.12–7.28]                   |
| Orphans due to AIDS ages 0 to 17 <sup>2</sup>                                                                          | 43 000<br>[36 000–49 000]    | 460 000 [390 000–550 000]     | [740 000–990 000]                  | 350 000<br>[280 000–440 000]       |
| HIV testing and treatment cascade                                                                                      |                              |                               |                                    |                                    |
| Percentage of PLHIV who know their status <sup>2</sup>                                                                 | >95% [91–>95]                | 90% [81–95]                   | 83 % [75–90]                       | 90% [85–>95]                       |
| Percentage of PLHIV who are on antiretroviral therapy <sup>2</sup>                                                     | >95% [88–>95]                | 79% [71–84]                   | 75% [67–81]                        | 85% [80–92]                        |
| Percentage of PLHIV who have suppressed viral loads <sup>2</sup>                                                       | 92% [85–>95]                 | 72% [65–77]                   | 69% [62–74]                        | 77% [72–82]                        |
| Coverage of pregnant women who receive antiretrovirals for prevention of mother-to-child transmission (%) <sup>2</sup> | >95% [88–>95]                | >95% [77–>95]                 | 92% [72–>95]                       | 86% [69–>95]                       |
| SW population size estimate (#) <sup>2</sup>                                                                           | 4000                         | 36 400                        | 155 500                            | 18 000                             |
| MSM population size estimate (#) <sup>2</sup>                                                                          | 2400                         | 42 600                        | 49 700                             | 6500                               |
| Social protection coverage in at least one area <sup>3</sup>                                                           | ---                          | 21.3                          | ---                                | 15.3                               |

<sup>1</sup> World Bank Population and GDP per capita (2019); GINI index for Eswatini (2016), Malawi (2015), Tanzania (2017) and Zambia (2015); poverty head count data for Eswatini (2015), Malawi (2016), Tanzania (2018) and Zambia (2015) (<https://data.worldbank.org/indicator/SP.POP.TOTL?locations=SZ-MW-TZ-ZM>).

<sup>2</sup> AIDSinfo [Internet]. Geneva: Joint United Nations Programme on HIV/AIDS.

(<https://aidsinfo.unaids.org/>).

<sup>3</sup> International Labour Organization (ILO). World social protection report 2017–2019: Universal social protection to achieve the Sustainable Development Goals. Geneva: ILO; 2017. Areas include child and family benefits, unemployment support, and health protection.

--- Data not available.
